# Supplementary material for: Nanoimprint lithography of nanoporous carbon materials for micro-supercapacitor architectures
Source: Royal Society of Chemistry journal article supplement (doi:10.1039/c8nr01535j), 2018-01-01
Supplement: c8nr01535j1.pdf [file c8nr01535j1.pdf]

Electronic Supplementary Information for

## Nanoimprint lithography of nanoporous carbon materials for micro-supercapacitor architectures

Stefanie Lochmann,<sup>a</sup> Julia Grothe,<sup>a</sup> Kai Eckhardt,<sup>a</sup> Desirée Leistenschneider,<sup>a</sup> Lars Borchardt,<sup>a</sup> and Stefan Kaskel\*<sup>a</sup>

Dresden University of Technology, Bergstrasse 66, 01069 Dresden, Germany.

E-mail: stefan.kaskel@tu-dresden.de; Fax: +49 351 463 37287; Tel: +49 351 463 33632

### S.1. Methods

#### Leakage current calculation

Leakage current is calculated measuring the self-discharge in open circuit after pre-charging the micro-EDLC to 1 V. The corresponding leakage current was estimated using the following equation:

$$I_{\text{leak}} = C \cdot \frac{dV}{dt} \quad (1)$$

Where  $I_{\text{leak}}$  is the leakage current,  $C$  is the capacitance obtained from the CV curves  $dV/dt$  is the discharge rate.

#### Energy and Power Densities

The electrochemical performance of the micro-EDLC devices was based on galvanostatic charge-discharge measurements. The volumetric energy density ( $E_{\text{vol.}}$ ) was obtained from equation (2):

$$E_{\text{vol.}} = \frac{A_{\text{dis}} \cdot I}{V_{\text{IDE}} \cdot 3600} \quad (2)$$

where  $A_{\text{dis.}}$  is the area of the integrated discharge curve and  $I$  the applied current.  $V_{\text{IDE}}$  is the complete volume of the interdigital electrodes.

The Volumetric power density ( $P$ ) is calculated from the energy density ( $E_{\text{vol.}}$ ) and the discharge time  $t_{\text{dis}}$ :

$$P_{\text{vol.}} = \frac{E_{\text{vol.}}}{t_{\text{dis}}} \quad (3)$$

## S.2. Supplementary Figures

### S.1

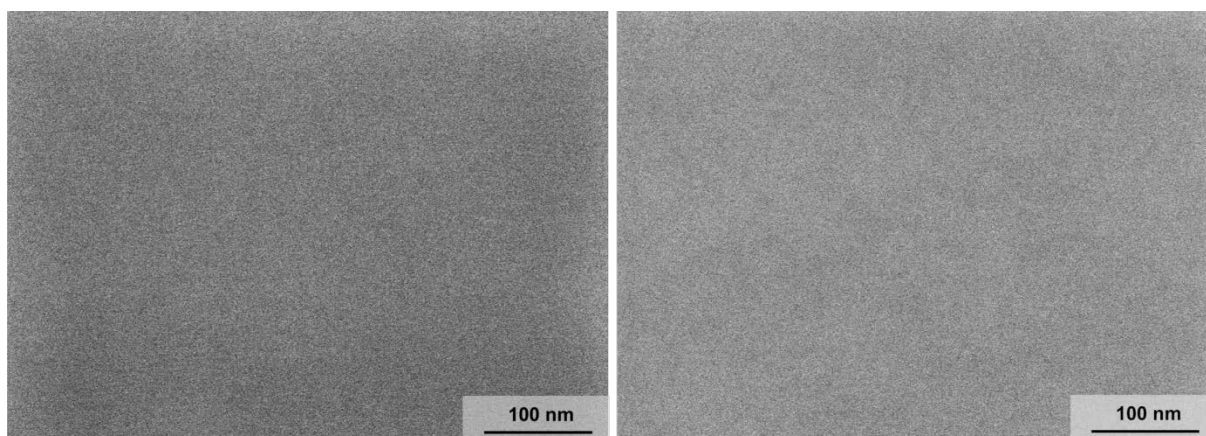

Figure S.1 - SEM images of a C<sub>F</sub> pyrolyzed at 900 °C (left) and an AC<sub>F</sub>-30 (right).

### S.2

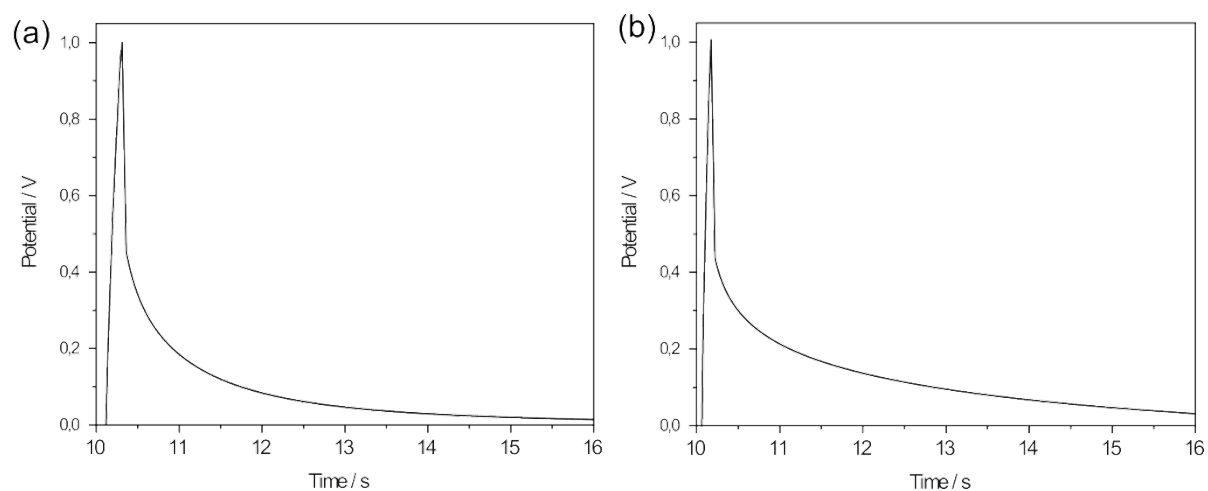

Figure S.2 – Galvanostatic charge/discharge curves of C<sub>IDE-0,5</sub> (a) and N-C<sub>IDE-0,5</sub> (b) measured with a current density of 1 mA cm<sup>-2</sup>.

### S.3

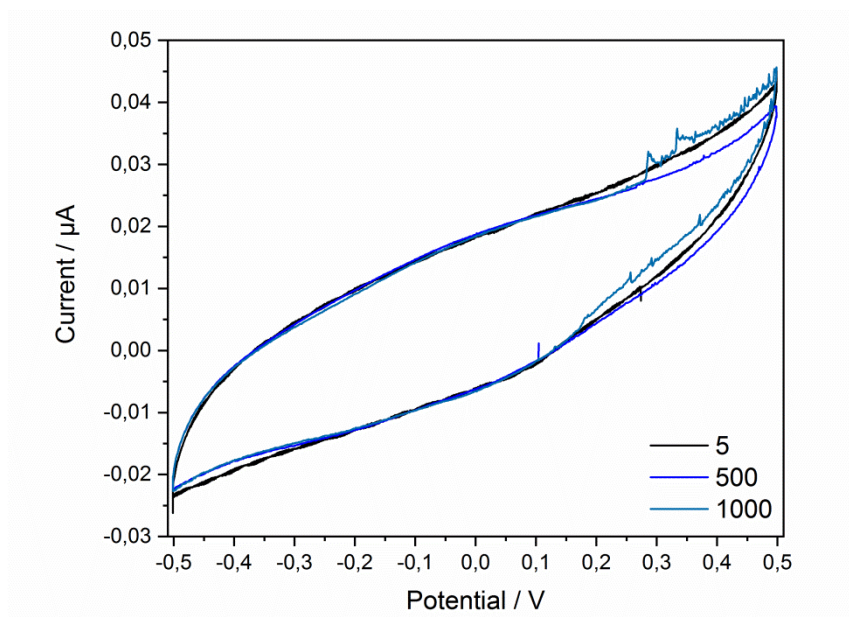

Figure S.3 – Cyclic voltammograms of N-C<sub>IDE-0,5</sub> at different cycle numbers (5; 500; 1000) measured at a scan rate of 10 mV s<sup>-1</sup>.

### S.4

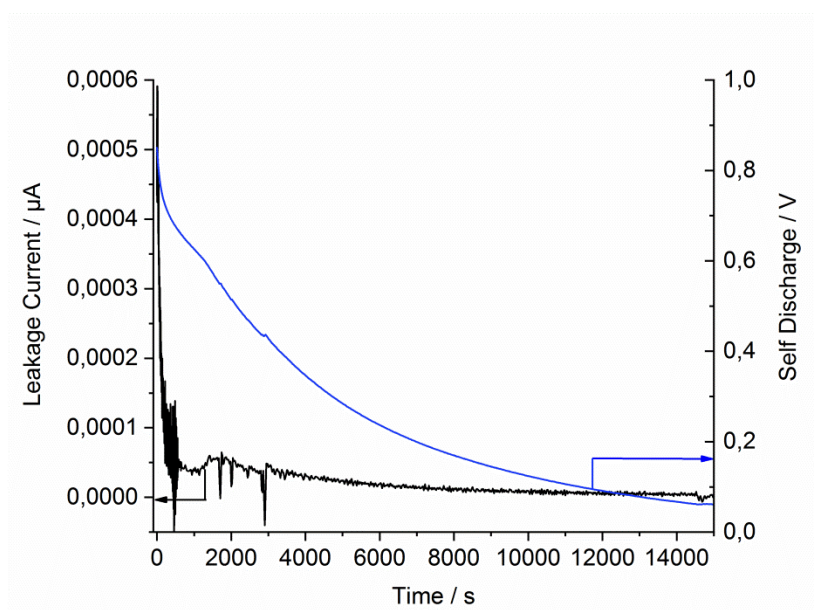

Figure S.4 – Leakage current and self-discharge characteristics of a N-C<sub>IDE-0,5</sub> after charging to 1 V and measuring the self-discharge at open circuit.

At the beginning a high leakage current is observed. After 4.000 seconds the current regulates to a constant value of  $1,5 \cdot 10^{-5} \mu\text{A}$ . The leakage current is probably caused by residual carbon between the lines of the two electrodes. An increase of the spacing between the fingers could reduce these effects.
